# Supplementary material for: Angle isomerism, as exemplified in a five-coordinate, dimeric copper(ii) Schiff base complex. Observation of Ostwald ripening
Source: Royal Society of Chemistry journal article supplement (doi:10.1039/c5nj02765a), 2016-01-01
Supplement: c5nj02765a1.pdf [file c5nj02765a1.pdf]

## Supplementary material

for

Angle isomerism, as exemplified in a five coordinate, dimeric copper(II)  
Schiff base complex. Observation of Ostwald ripening

Shanti G. Patra <sup>a</sup>, Nirmal K. Shee <sup>a</sup>, Michael G. B. Drew <sup>b</sup> and Dipankar

Datta \* <sup>a</sup>

### Coordinates of the optimised geometries of 1a and 1b at BP86/LanL2DZ level

**1a** at LanL2DZ/BP86  
Standard orientation:

| Center<br>Number | Atomic<br>Number | Atomic<br>Type | Coordinates (Angstroms) |           |           |
|------------------|------------------|----------------|-------------------------|-----------|-----------|
|                  |                  |                | X                       | Y         | Z         |
| 1                | 17               | 0              | 0.536155                | -0.296692 | 1.722354  |
| 2                | 29               | 0              | -1.405487               | 0.649020  | 0.722637  |
| 3                | 6                | 0              | 0.323260                | 3.117944  | 1.169286  |
| 4                | 1                | 0              | 1.102814                | 2.389272  | 1.412240  |
| 5                | 6                | 0              | 0.550083                | 4.511572  | 1.148182  |
| 6                | 1                | 0              | 1.539977                | 4.904693  | 1.396566  |
| 7                | 6                | 0              | -0.525150               | 5.373759  | 0.807032  |
| 8                | 1                | 0              | -0.375016               | 6.458476  | 0.776360  |
| 9                | 6                | 0              | -1.789796               | 4.831763  | 0.506523  |
| 10               | 1                | 0              | -2.644958               | 5.455425  | 0.232818  |
| 11               | 6                | 0              | -1.963697               | 3.422414  | 0.558651  |
| 12               | 6                | 0              | -4.253759               | 0.700656  | 0.194797  |
| 13               | 6                | 0              | -3.898476               | -0.681094 | 0.508533  |
| 14               | 6                | 0              | -5.545395               | 1.180030  | -0.369279 |
| 15               | 6                | 0              | -6.211902               | 2.316365  | 0.169695  |
| 16               | 1                | 0              | -5.771171               | 2.847675  | 1.018577  |
| 17               | 6                | 0              | -7.430829               | 2.762904  | -0.387697 |
| 18               | 1                | 0              | -7.935760               | 3.636024  | 0.041925  |
| 19               | 6                | 0              | -7.996016               | 2.093787  | -1.500914 |
| 20               | 1                | 0              | -8.938721               | 2.445811  | -1.936156 |
| 21               | 6                | 0              | -7.330011               | 0.973465  | -2.055893 |
| 22               | 1                | 0              | -7.751968               | 0.458154  | -2.926536 |
| 23               | 6                | 0              | -6.114489               | 0.520670  | -1.496726 |
| 24               | 1                | 0              | -5.595882               | -0.338227 | -1.937643 |
| 25               | 6                | 0              | -4.874630               | -1.801652 | 0.638601  |

|    |    |   |           |           |           |
|----|----|---|-----------|-----------|-----------|
| 26 | 6  | 0 | -6.244401 | -1.605182 | 0.978973  |
| 27 | 1  | 0 | -6.638602 | -0.594765 | 1.118093  |
| 28 | 6  | 0 | -7.096437 | -2.715825 | 1.165269  |
| 29 | 1  | 0 | -8.145655 | -2.552867 | 1.436508  |
| 30 | 6  | 0 | -6.600260 | -4.033432 | 1.011363  |
| 31 | 1  | 0 | -7.267161 | -4.892086 | 1.152730  |
| 32 | 6  | 0 | -5.235017 | -4.237397 | 0.688314  |
| 33 | 1  | 0 | -4.842579 | -5.255595 | 0.585099  |
| 34 | 6  | 0 | -4.377872 | -3.131805 | 0.514062  |
| 35 | 1  | 0 | -3.312578 | -3.270063 | 0.302880  |
| 36 | 7  | 0 | -0.898384 | 2.590906  | 0.887065  |
| 37 | 7  | 0 | -3.220958 | 2.858377  | 0.291596  |
| 38 | 7  | 0 | -3.186662 | 1.528459  | 0.411510  |
| 39 | 8  | 0 | -2.635906 | -0.975513 | 0.758424  |
| 40 | 17 | 0 | -0.536293 | 0.295946  | -1.722281 |
| 41 | 29 | 0 | 1.405485  | -0.649449 | -0.722625 |
| 42 | 6  | 0 | -0.322885 | -3.118725 | -1.168695 |
| 43 | 1  | 0 | -1.102551 | -2.390224 | -1.411810 |
| 44 | 6  | 0 | -0.549504 | -4.512381 | -1.147228 |
| 45 | 1  | 0 | -1.539348 | -4.905717 | -1.395467 |
| 46 | 6  | 0 | 0.525867  | -5.374324 | -0.805900 |
| 47 | 1  | 0 | 0.375891  | -6.459054 | -0.774950 |
| 48 | 6  | 0 | 1.790445  | -4.832069 | -0.505567 |
| 49 | 1  | 0 | 2.645703  | -5.455540 | -0.231724 |
| 50 | 6  | 0 | 1.964135  | -3.422710 | -0.558049 |
| 51 | 6  | 0 | 4.253753  | -0.700490 | -0.194786 |
| 52 | 6  | 0 | 3.898235  | 0.681123  | -0.508846 |
| 53 | 6  | 0 | 5.545476  | -1.179486 | 0.369408  |
| 54 | 6  | 0 | 6.212108  | -2.315957 | -0.169120 |
| 55 | 1  | 0 | 5.771396  | -2.847687 | -1.017748 |
| 56 | 6  | 0 | 7.431132  | -2.762085 | 0.388391  |
| 57 | 1  | 0 | 7.936162  | -3.635315 | -0.040889 |
| 58 | 6  | 0 | 7.996295  | -2.092410 | 1.501284  |
| 59 | 1  | 0 | 8.939078  | -2.444116 | 1.936614  |
| 60 | 6  | 0 | 7.330157  | -0.971954 | 2.055838  |
| 61 | 1  | 0 | 7.752091  | -0.456220 | 2.926242  |
| 62 | 6  | 0 | 6.114536  | -0.519577 | 1.496557  |
| 63 | 1  | 0 | 5.595825  | 0.339429  | 1.937138  |
| 64 | 6  | 0 | 4.874202  | 1.801797  | -0.639302 |
| 65 | 6  | 0 | 6.244005  | 1.605448  | -0.979606 |
| 66 | 1  | 0 | 6.638384  | 0.595051  | -1.118381 |
| 67 | 6  | 0 | 7.095851  | 2.716175  | -1.166275 |
| 68 | 1  | 0 | 8.145097  | 2.553303  | -1.437456 |
| 69 | 6  | 0 | 6.599448  | 4.033748  | -1.012812 |
| 70 | 1  | 0 | 7.266202  | 4.892469  | -1.154472 |
| 71 | 6  | 0 | 5.234169  | 4.237589  | -0.689832 |
| 72 | 1  | 0 | 4.841551  | 5.255753  | -0.586965 |
| 73 | 6  | 0 | 4.377215  | 3.131910  | -0.515201 |
| 74 | 1  | 0 | 3.311898  | 3.270053  | -0.304061 |
| 75 | 7  | 0 | 0.898695  | -2.591447 | -0.886659 |
| 76 | 7  | 0 | 3.221317  | -2.858412 | -0.291139 |
| 77 | 7  | 0 | 3.186796  | -1.528527 | -0.411318 |
| 78 | 8  | 0 | 2.635599  | 0.975277  | -0.758756 |

---

**1b** at LanL2DZ/BP86  
Standard orientation:

| Center<br>Number | Atomic<br>Number | Atomic<br>Type | Coordinates (Angstroms) |           |           |
|------------------|------------------|----------------|-------------------------|-----------|-----------|
|                  |                  |                | X                       | Y         | Z         |
| 1                | 29               | 0              | -1.470459               | -0.721068 | 0.403031  |
| 2                | 17               | 0              | 0.345522                | 0.003529  | 1.790263  |
| 3                | 7                | 0              | -1.004382               | -2.669548 | 0.321795  |
| 4                | 6                | 0              | 0.230664                | -3.232022 | 0.417690  |
| 5                | 1                | 0              | 1.060891                | -2.540656 | 0.590480  |
| 6                | 6                | 0              | 0.414846                | -4.626593 | 0.286881  |
| 7                | 1                | 0              | 1.420335                | -5.047230 | 0.373596  |
| 8                | 6                | 0              | -0.717383               | -5.447838 | 0.046222  |
| 9                | 1                | 0              | -0.601667               | -6.532631 | -0.054072 |
| 10               | 6                | 0              | -1.995104               | -4.864958 | -0.069187 |
| 11               | 1                | 0              | -2.894732               | -5.456397 | -0.259206 |
| 12               | 6                | 0              | -2.121427               | -3.456856 | 0.066743  |
| 13               | 7                | 0              | -3.381017               | -2.846176 | -0.055686 |
| 14               | 7                | 0              | -3.286984               | -1.520464 | 0.078716  |
| 15               | 6                | 0              | -4.355025               | -0.663093 | 0.088569  |
| 16               | 6                | 0              | -3.906643               | 0.712806  | 0.260673  |
| 17               | 8                | 0              | -2.638754               | 0.948255  | 0.548896  |
| 18               | 6                | 0              | -4.780076               | 1.910327  | 0.101591  |
| 19               | 6                | 0              | -5.852461               | 1.956812  | -0.833953 |
| 20               | 1                | 0              | -6.086723               | 1.078263  | -1.442761 |
| 21               | 6                | 0              | -6.599989               | 3.143899  | -0.996003 |
| 22               | 1                | 0              | -7.416376               | 3.174564  | -1.726395 |
| 23               | 6                | 0              | -6.297356               | 4.291047  | -0.221517 |
| 24               | 1                | 0              | -6.887380               | 5.207027  | -0.343769 |
| 25               | 6                | 0              | -5.227337               | 4.252630  | 0.707888  |
| 26               | 1                | 0              | -4.990973               | 5.137561  | 1.310040  |
| 27               | 6                | 0              | -4.465511               | 3.074772  | 0.859898  |
| 28               | 1                | 0              | -3.625786               | 3.032004  | 1.562013  |
| 29               | 6                | 0              | -5.769213               | -1.124785 | 0.041218  |
| 30               | 6                | 0              | -6.713099               | -0.626913 | 0.985532  |
| 31               | 1                | 0              | -6.389759               | 0.094030  | 1.744957  |
| 32               | 6                | 0              | -6.199869               | -2.088233 | -0.914487 |
| 33               | 1                | 0              | -5.479102               | -2.498561 | -1.628087 |
| 34               | 6                | 0              | -7.544963               | -2.518852 | -0.941246 |
| 35               | 1                | 0              | -7.862834               | -3.256119 | -1.687745 |
| 36               | 6                | 0              | -8.479294               | -2.008449 | -0.006518 |
| 37               | 1                | 0              | -9.521490               | -2.348281 | -0.026283 |
| 38               | 6                | 0              | -8.055866               | -1.063863 | 0.960133  |
| 39               | 1                | 0              | -8.767685               | -0.673184 | 1.696600  |
| 40               | 29               | 0              | 1.470396                | 0.721110  | -0.402578 |
| 41               | 17               | 0              | -0.345630               | -0.003436 | -1.789832 |
| 42               | 7                | 0              | 1.004394                | 2.669605  | -0.321393 |
| 43               | 6                | 0              | -0.230666               | 3.232097  | -0.416980 |
| 44               | 1                | 0              | -1.060981               | 2.540732  | -0.589354 |
| 45               | 6                | 0              | -0.414756               | 4.626700  | -0.286387 |
| 46               | 1                | 0              | -1.420261               | 5.047354  | -0.372840 |
| 47               | 6                | 0              | 0.717583                | 5.447957  | -0.046285 |
| 48               | 1                | 0              | 0.601937                | 6.532774  | 0.053825  |
| 49               | 6                | 0              | 1.995324                | 4.865059  | 0.068801  |
| 50               | 1                | 0              | 2.895036                | 5.456507  | 0.258391  |
| 51               | 6                | 0              | 2.121554                | 3.456926  | -0.066884 |

|    |   |   |          |           |           |
|----|---|---|----------|-----------|-----------|
| 52 | 7 | 0 | 3.381160 | 2.846223  | 0.055279  |
| 53 | 7 | 0 | 3.287034 | 1.520487  | -0.078836 |
| 54 | 6 | 0 | 4.355039 | 0.663070  | -0.088786 |
| 55 | 6 | 0 | 3.906560 | -0.712844 | -0.260501 |
| 56 | 8 | 0 | 2.638575 | -0.948317 | -0.548270 |
| 57 | 6 | 0 | 4.779988 | -1.910361 | -0.101362 |
| 58 | 6 | 0 | 5.852605 | -1.956664 | 0.833923  |
| 59 | 1 | 0 | 6.087051 | -1.077978 | 1.442464  |
| 60 | 6 | 0 | 6.600142 | -3.143735 | 0.996052  |
| 61 | 1 | 0 | 7.416715 | -3.174255 | 1.726242  |
| 62 | 6 | 0 | 6.297278 | -4.291049 | 0.221903  |
| 63 | 1 | 0 | 6.887306 | -5.207019 | 0.344215  |
| 64 | 6 | 0 | 5.227028 | -4.252811 | -0.707243 |
| 65 | 1 | 0 | 4.990487 | -5.137873 | -1.309134 |
| 66 | 6 | 0 | 4.465197 | -3.074967 | -0.859327 |
| 67 | 1 | 0 | 3.625294 | -3.032334 | -1.561237 |
| 68 | 6 | 0 | 5.769261 | 1.124706  | -0.041836 |
| 69 | 6 | 0 | 6.712911 | 0.626650  | -0.986288 |
| 70 | 1 | 0 | 6.389370 | -0.094395 | -1.745531 |
| 71 | 6 | 0 | 6.200180 | 2.088281  | 0.913622  |
| 72 | 1 | 0 | 5.479596 | 2.498751  | 1.627325  |
| 73 | 6 | 0 | 7.545298 | 2.518848  | 0.940007  |
| 74 | 1 | 0 | 7.863371 | 3.256216  | 1.686321  |
| 75 | 6 | 0 | 8.479392 | 2.008268  | 0.005140  |
| 76 | 1 | 0 | 9.521607 | 2.348062  | 0.024611  |
| 77 | 6 | 0 | 8.055701 | 1.063553  | -0.961268 |
| 78 | 1 | 0 | 8.767332 | 0.672731  | -1.697842 |

---
